# Supplementary material for: New and recurrent gain-of-function STAT1 mutations in patients with chronic mucocutaneous candidiasis from Eastern and Central Europe
Source: PubMed Central journal article supplement — J Med Genet. 2013 May 24;50(9):567–78. doi: 10.1136/jmedgenet-2013-101570 (PMC3756505; doi:10.1136/jmedgenet-2013-101570), 2013-05-24

**Supplementary figure 1: Sequence analysis of gDNA isolated from EBV-immortalized lymphoblasts of patients P4, P5 and P8. Electropherograms show the same mutation as found in gDNA freshly isolated from peripheral blood cells.**

**Supplementary figure 1.**

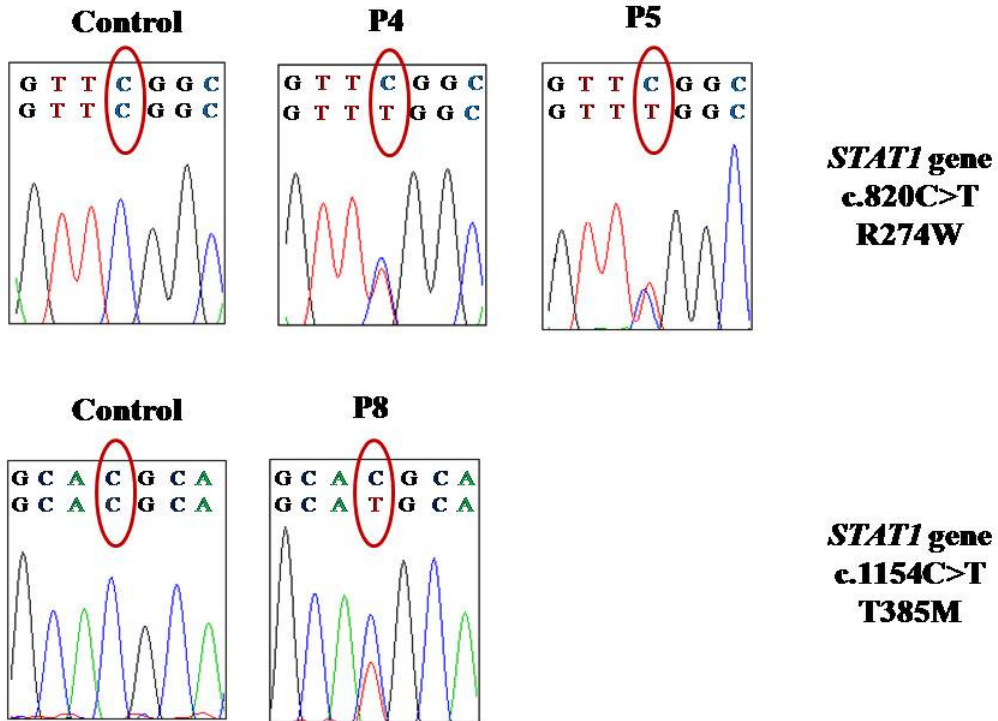

**Supplementary figure 2:** Detection of pSTAT1 by western blotting, in EBV-transformed B cells from patient P4 (left) and patient P8 (right) with CMCD and from a healthy control (C, middle). Cells were treated with IFN- $\gamma$  in the presence or absence of pervanadate, as described in Patients and Methods. Data are representative of three independent experiments.

**Supplementary figure 2.**

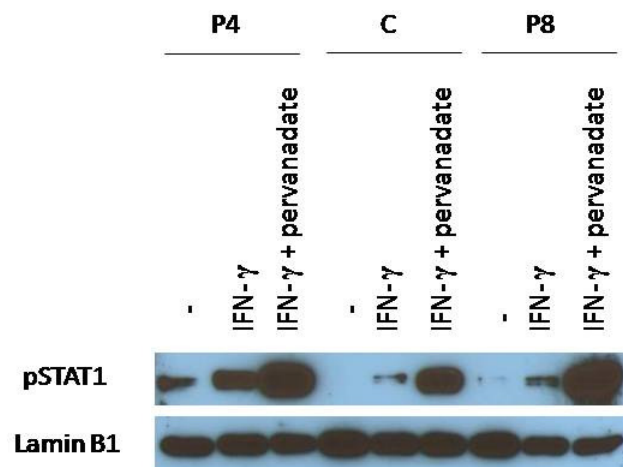

Supplement: jmedgenet-2013-101570-s2.pdf [file jmedgenet-2013-101570-s2.pdf]
